# Supplementary material for: The North American bullfrog draft genome provides insight into hormonal regulation of long noncoding RNA
Source: PubMed Central journal article supplement (PMC5681567; doi:10.1038/s41467-017-01316-7), 2017-11-10
Supplement: 41467_2017_1316_MOESM1_ESM.pdf [file 41467_2017_1316_MOESM1_ESM.pdf]

## Supplementary Information

### Supplementary Figures

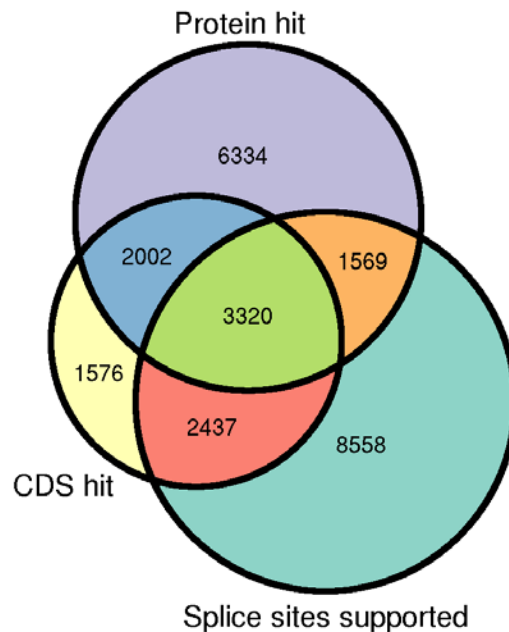

**Supplementary Figure 1. Selection criteria for the high confidence gene set.** Transcripts were included in the high confidence set if they satisfied one or more of the following criteria: 1) the gene contained at least one splice site, and all splice sites were confirmed by an alignment to external transcript evidence (splice sites supported); 2) the CDS had a BLASTn alignment to a BART contig with at least 95% identity along 99% of its length (CDS hit); 3) the protein sequence encoded by the CDS had a BLASTp alignment to a human or amphibian Swiss-Prot protein sequence with at least 50% identity along 90% of its length (Protein hit).



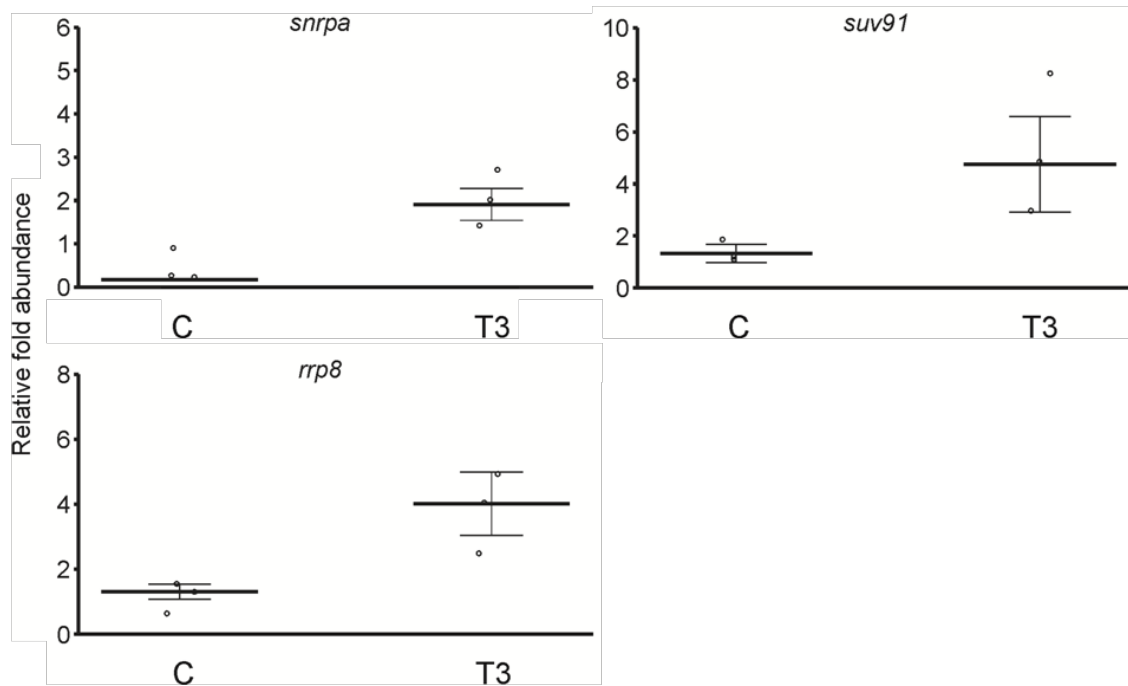

**Supplementary Figure 3. qPCR analysis of select transcripts encoding proteins involved in RNA/DNA processing in the back skin.** Premetamorphic tadpoles (n = 3 per treatment) were injected with 10 pmol/g body weight of T3 or dilute sodium hydroxide solvent (C) and the back skin collected after 48 h for RNA isolation and qPCR analysis. The median fold abundance of transcripts encoding U1 small nuclear ribonucleoprotein A (*snrpa*), ribosomal RNA processing protein 8 (*rrp8*), and histone-lysine-N-methyltransferase (*suv91*) relative to the control is shown. Whiskers indicate the median absolute deviation, and the open circles denote the fold difference of individual animals. All transcripts were significantly different (Mann-Whitney U test,  $p < 0.05$ ).

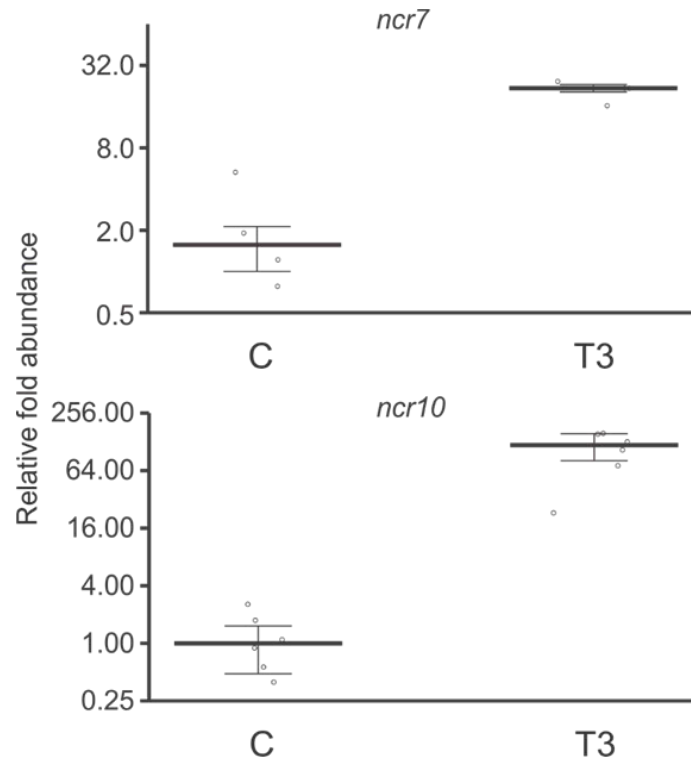

**Supplementary Figure 4. qPCR analysis of select lncRNA transcripts in the back skin.**

Premetamorphic tadpoles (n = 6 per treatment) were injected with 10 pmol/g body weight of T3 or dilute sodium hydroxide solvent (C) and the back skin collected after 48 h for RNA isolation and qPCR analysis. The median fold abundance of transcripts of candidate lncRNAs, *ncr7* and *ncr10* relative to the control is shown. Whiskers indicate the median absolute deviation, and the open circles denote the fold difference of individual animals. Both transcripts were significantly different (Mann-Whitney U test,  $p < 0.05$ ).

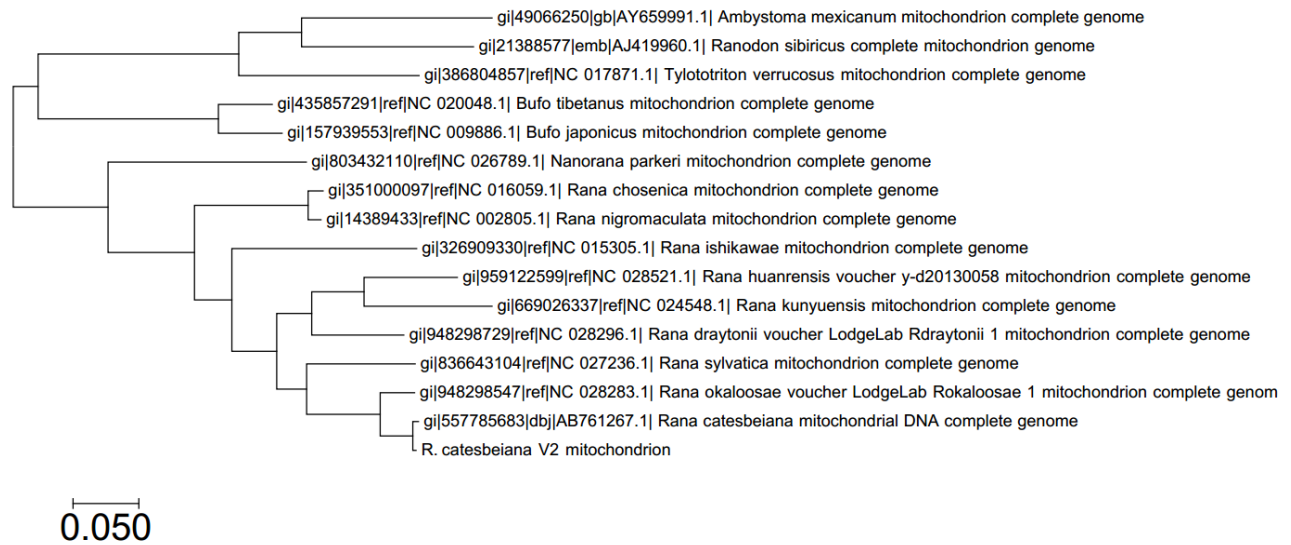

**Supplementary Figure 5. Molecular phylogenetic analysis of complete mitochondrial**

**genomes of selected amphibians by Maximum Likelihood method.** The evolutionary history was inferred by using the Maximum Likelihood method based on the Tamura-Nei model<sup>24</sup>. The tree with the highest log likelihood (-91034.06) is shown. Initial tree(s) for the heuristic search were obtained automatically by applying Neighbor-Join and BioNJ algorithms to a matrix of pairwise distances estimated using the Maximum Composite Likelihood (MCL) approach, and then selecting the topology with superior log likelihood value. The tree is drawn to scale, with branch lengths measured in the number of substitutions per site. The analysis involved 16 nucleotide sequences (see Supplementary Table 8). All positions containing gaps and missing data were eliminated. There were a total of 10,646 positions in the final dataset. Evolutionary analyses were conducted in MEGA7<sup>25</sup>.

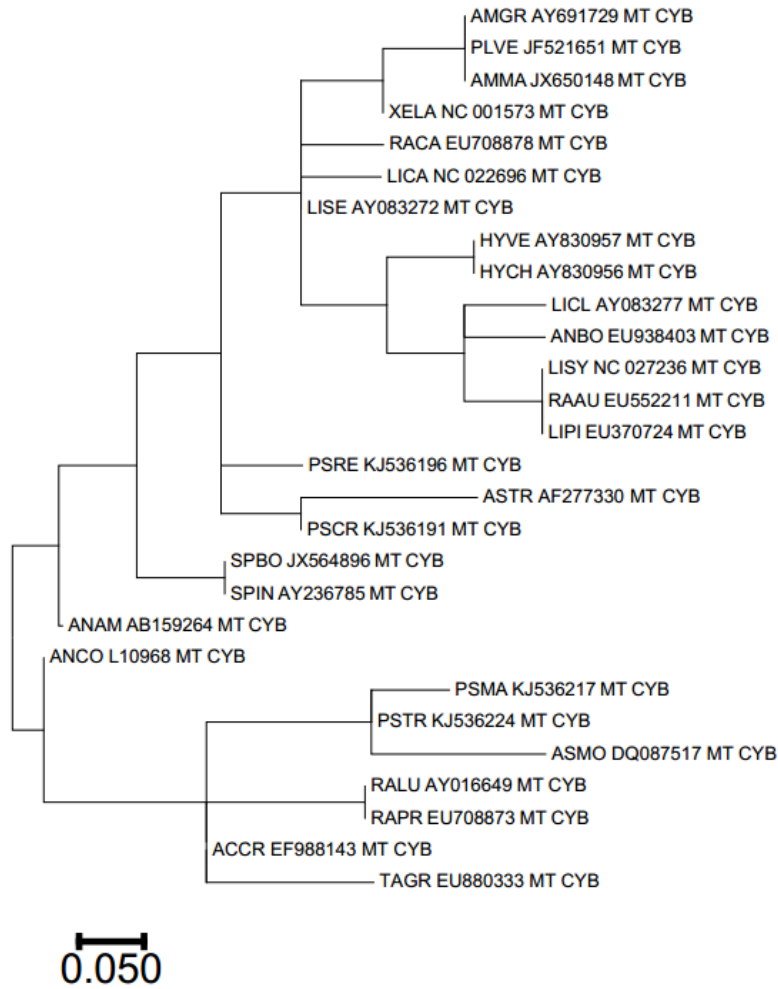

**Supplementary Figure 6. Molecular phylogenetic analysis of mitochondrial *cyb* (MT CYB) genes of selected amphibians by Maximum Likelihood method.** Sequences are annotated with the first two letters of the organisms' genus and species, respectively, followed by the NCBI GenBank accession number. See Supplementary Figure 5 legend for details of analysis and Supplementary Table 9 for additional information including the species code.

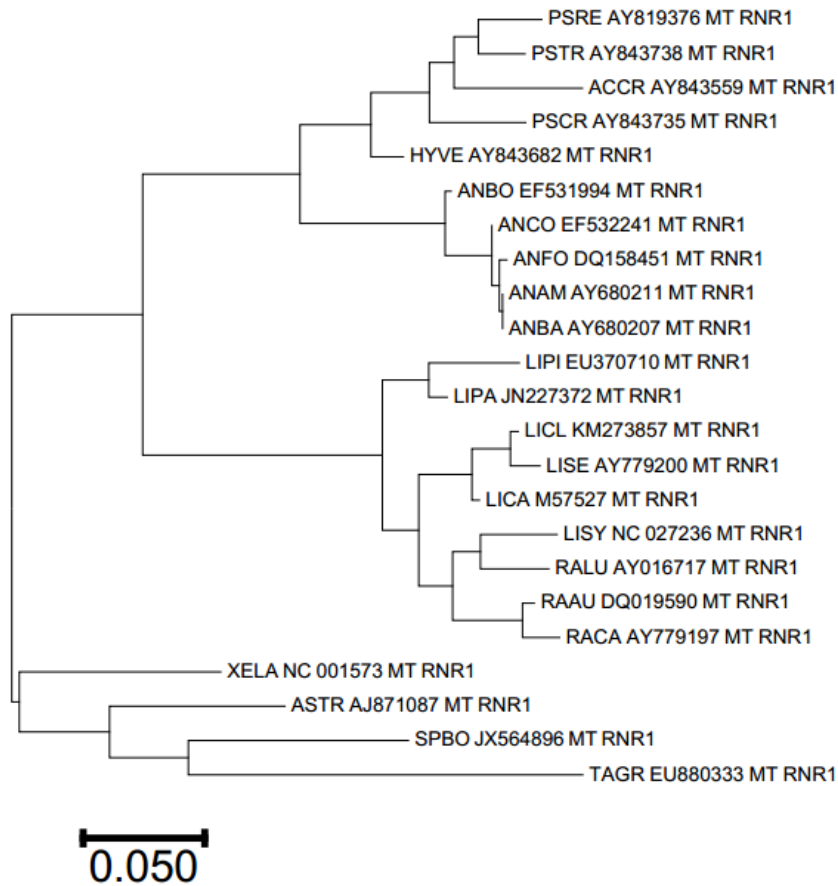

**Supplementary Figure 7. Molecular phylogenetic analysis of mitochondrial *rnr1* (MT RNR1) genes of selected amphibians by Maximum Likelihood method.** Sequences are annotated with the first two letters of the organisms' genus and species, respectively, followed by the NCBI GenBank accession number. See Supplementary Figure 5 legend for details of analysis and Supplementary Table 9 for additional information including the species code.

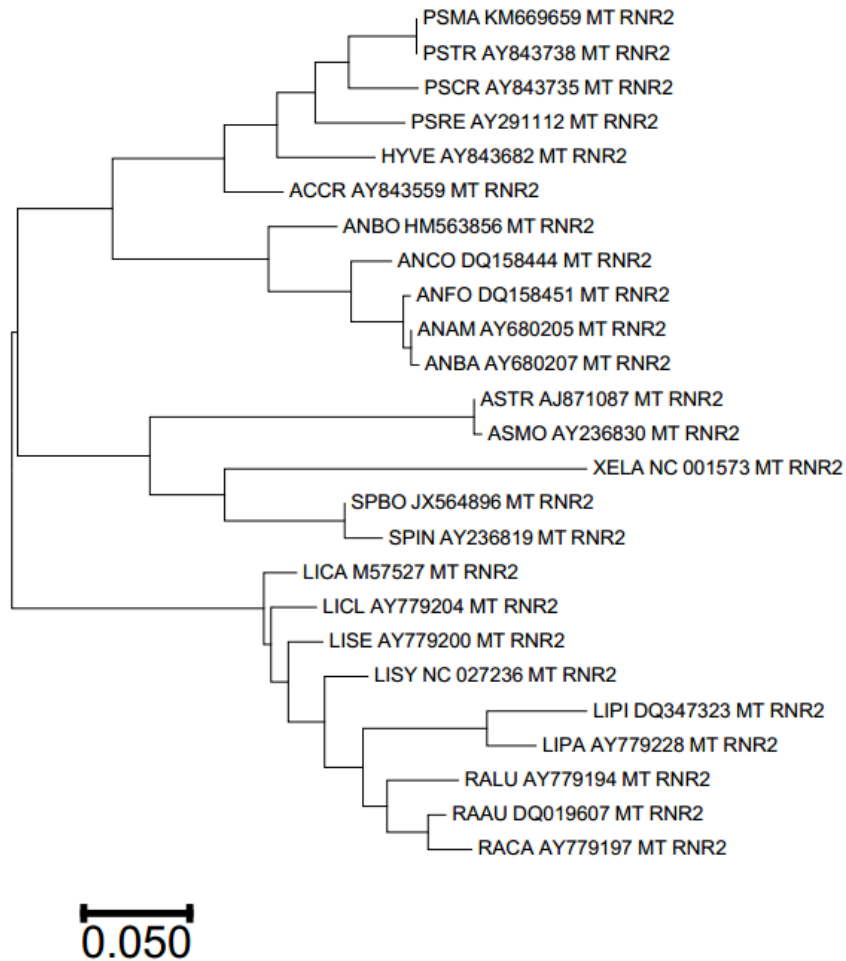

**Supplementary Figure 8. Molecular phylogenetic analysis of mitochondrial *rnr2* (MT RNR2) genes of selected amphibians by Maximum Likelihood method.** Sequences are annotated with the first two letters of the organisms' genus and species, respectively, followed by the NCBI GenBank accession number. See Supplementary Figure 5 legend for details of analysis and Supplementary Table 9 for additional information including the species code.



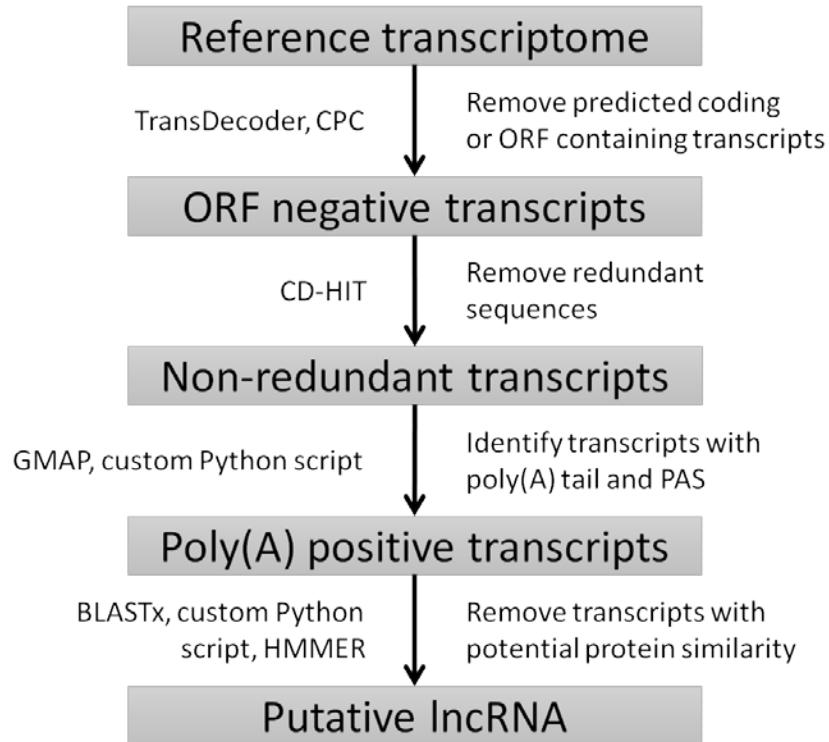

**Supplementary Figure 9. Workflow for detection of putative lncRNA transcripts.** BART

contigs with low protein coding potential were excluded, as were redundant sequences.

Polyadenylated transcript sequences were selected, and any residual sequences that may have encoded a peptide sequence with similarity to any database sequences were eliminated to arrive at the set of putative lncRNA sequences.

## Supplementary Tables

**Supplementary Table 1.** Scaffolding the North American bullfrog genome with long-range distance information. TGA = Targeted Gene Assembly; WGA = Whole Genome Assembly.

| Methodology                          | Data Source                     | Number of merges | NG50 (bp) | BUSCO Complete | BUSCO Complete + Fragmented |
|--------------------------------------|---------------------------------|------------------|-----------|----------------|-----------------------------|
| ABYSS v1.9.0 k160                    | MPET (7kbp)                     | NA               | 23,361    | 1169           | 2146                        |
| RAILS v0.1                           | SLR (Moleculo)<br>Kollector TGA | 56,784           | 30,085    | 1282           | 2276                        |
| ABYSS -<br>longscaffolding<br>v1.9.0 | BART                            | NA               | 33,847    | 1497           | 2413                        |
| LINKS v1.7 x10                       | SLR (Moleculo)                  | 29,178           | 34,492    | 1500           | 2435                        |
| LINKS v1.7                           | MPET (7 kbp)                    | 108,578          | 50,123    | 1646           | 2539                        |
| LINKS v1.7 x7                        | Kollector TGA and<br>k128 WGA   | 77,885           | 58,021    | 1749           | 2623                        |
| ARCS                                 | Chromium linked<br>reads        | 15,059           | 68,964    | 1787           | 2650                        |

**Supplementary Table 2.** Estimated proportion of repetitive DNA sequences in *R. catesbeiana* (version 2) and select organisms.

| Species                              | Approx. haploid genome size (Gbp) | Estimated interspersed repeat content (%) | Reference                              |
|--------------------------------------|-----------------------------------|-------------------------------------------|----------------------------------------|
| <i>Rana (Lithobates) catesbeiana</i> | 5.8                               | 62                                        | The present study                      |
| <i>Homo sapiens</i>                  | 3.1                               | 56                                        | Smit <i>et al.</i> (2013) <sup>4</sup> |
| <i>Nanorana parkeri</i>              | 2.3                               | 47                                        | Sun <i>et al.</i> (2015) <sup>26</sup> |
| <i>Xenopus tropicalis</i>            | 1.5                               | 43                                        | Sun <i>et al.</i> (2015) <sup>26</sup> |

**Supplementary Table 3.** Comparison of relative fold abundance of select back skin transcripts significantly increased upon T3 exposure.

| Transcript         | Fold abundance relative to control |            |
|--------------------|------------------------------------|------------|
|                    | RNA-seq                            | qPCR       |
| <i>thrb</i>        | 3.1 ± 0.1                          | 8.4 ± 0.1* |
| RNA/DNA processing |                                    |            |
| <i>snrpa</i>       | 5.2 ± 0.2                          | 11.1 ± 2.2 |
| <i>rrp8</i>        | 3.5 ± 0.2                          | 3.1 ± 0.8  |
| <i>suv39h1</i>     | 2.5 ± 0.2                          | 3.6 ± 1.4  |

\* From Maher *et al.* (2016)<sup>3</sup>

**Supplementary Table 4.** Targeted qPCR primer information.

| Gene transcript | Primer name | Primer sequence         | Amplicon length (bp) | Annealing Temperature (°C) |
|-----------------|-------------|-------------------------|----------------------|----------------------------|
| <i>snrpa</i>    | 150110      | TCCCAGAAGAGACAAACGAG    | 211                  | 64                         |
|                 | 150111      | GCAGGCTACTTTTTGGCAA     |                      |                            |
| <i>rrp8</i>     | 150114      | TGACTCTGCGTTCCCGTAT     | 254                  | 64                         |
|                 | 150115      | AGCATCACCACAGCCAAA      |                      |                            |
| <i>suv91</i>    | 150116      | AAATGCGGATTACTACTG      | 248                  | 60                         |
|                 | 150117      | CTCCAATGAGTTAGGGT       |                      |                            |
| <i>ncr7</i>     | 160157      | GTTTCATCAAGTAGGTCTCCAAT | 254                  | 60                         |
|                 | 160158      | TATCACCAGTCAGAGCCATAA   |                      |                            |
| <i>ncr10</i>    | 160141      | ACAAGTAAGGACAGGGAGTGG   | 244                  | 60                         |
|                 | 160142      | GGAGTCAGGGTTCTGTAGG     |                      |                            |

**Supplementary Table 5.** *R. catesbeiana* RNA-Seq data. Reads are available under NCBI BioProject PRJNA286013. DE = read sets used for the differential gene expression experiment; BART = read sets assembled with Trans-ABYSS to construct BART. References: (1) Hammond *et al.* (2015); (2) the present study.

| Tissue         | Chemical Condition   | Sequencing Platform | Read Length (bp) | Read Pairs (M) | Utilization | Reference   |
|----------------|----------------------|---------------------|------------------|----------------|-------------|-------------|
| Back Skin      | dilute NaOH          | HiSeq2000           | 75               | 139            | BART        | (1)         |
| Back Skin      | dilute NaOH          | HiSeq2000           | 75               | 90             | BART        | (1)         |
| Back Skin      | dilute NaOH          | HiSeq2500           | 100              | 135            | DE, BART    | (2)         |
| Back Skin      | dilute NaOH          | HiSeq2500           | 100              | 178            | DE, BART    | (2)         |
| Back Skin      | dilute NaOH          | HiSeq2500           | 100              | 156            | DE, BART    | (2)         |
| Back Skin      | 10 nM T <sub>3</sub> | HiSeq2000           | 75               | 121            | BART        | (1)         |
| Back Skin      | 10 nM T <sub>3</sub> | HiSeq2000           | 75               | 136            | BART        | (1)         |
| Back Skin      | 10 nM T <sub>3</sub> | HiSeq2500           | 100              | 158            | DE, BART    | (2)         |
| Back Skin      | 10 nM T <sub>3</sub> | HiSeq2500           | 100              | 141            | DE, BART    | (2)         |
| Back Skin      | 10 nM T <sub>3</sub> | HiSeq2500           | 100              | 161            | DE, BART    | (2)         |
| Tail Fin       | dilute NaOH          | HiSeq2000           | 75               | 96             | BART        | (1)         |
| Tail Fin       | dilute NaOH          | HiSeq2000           | 75               | 101            | BART        | (1)         |
| Tail Fin       | 10 nM T <sub>3</sub> | HiSeq2000           | 75               | 193            | BART        | (1)         |
| Tail Fin       | 10 nM T <sub>3</sub> | HiSeq2000           | 75               | 122            | BART        | (1)         |
| Lung           | dilute NaOH          | HiSeq2000           | 75               | 108            | BART        | (1)         |
| Lung           | dilute NaOH          | HiSeq2000           | 75               | 114            | BART        | (1)         |
| Lung           | 10 nM T <sub>3</sub> | HiSeq2000           | 75               | 125            | BART        | (1)         |
| Lung           | 10 nM T <sub>3</sub> | HiSeq2000           | 75               | 115            | BART        | (1)         |
| Brain          | dilute NaOH          | HiSeq2000           | 75               | 110            | BART        | (1)         |
| Brain          | dilute NaOH          | HiSeq2000           | 75               | 100            | BART        | (1)         |
| Brain          | dilute NaOH          | HiSeq2000           | 75               | 98             | BART        | (1)         |
| Brain          | 10 nM T <sub>3</sub> | HiSeq2000           | 75               | 116            | BART        | (1)         |
| Brain          | 10 nM T <sub>3</sub> | HiSeq2000           | 75               | 101            | BART        | (1)         |
| Brain          | 10 nM T <sub>3</sub> | HiSeq2000           | 75               | 126            | BART        | (1)         |
| Olfactory Bulb | solvent              | MiSeq               | 100              | 9              | BART        | Unpublished |
| Olfactory Bulb | solvent              | MiSeq               | 100              | 14             | BART        | Unpublished |
| Olfactory Bulb | solvent              | MiSeq               | 100              | 8              | BART        | Unpublished |
| Olfactory Bulb | solvent              | MiSeq               | 100              | 8              | BART        | Unpublished |
| Olfactory Bulb | Chemical Cocktail    | MiSeq               | 100              | 12             | BART        | Unpublished |
| Olfactory Bulb | Chemical Cocktail    | MiSeq               | 100              | 11             | BART        | Unpublished |
| Olfactory Bulb | Chemical Cocktail    | MiSeq               | 100              | 8              | BART        | Unpublished |
| Olfactory Bulb | Chemical Cocktail    | MiSeq               | 100              | 9              | BART        | Unpublished |

**Supplementary Table 6.** DNA poly(A) hexamer motifs considered for detection of cleavage site. Observed frequency of usage in *Homo sapiens* noted for reference.

| DNA hexamer | Usage frequency<br>( <i>Homo sapiens</i> , %)* |
|-------------|------------------------------------------------|
| AATAAA      | 52.0%                                          |
| ATTAAA      | 14.9%                                          |
| TATAAA      | 3.2%                                           |
| AGTAAA      | 2.7%                                           |
| AATATA      | 1.7%                                           |
| CATAAA      | 1.3%                                           |
| GATAAA      | 1.3%                                           |
| AATACA      | 1.2%                                           |
| TTTAAA      | 1.2%                                           |
| AAGAAA      | 1.1%                                           |
| AAAAAG      | 0.8%                                           |
| AATGAA      | 0.8%                                           |
| AATAGA      | 0.7%                                           |
| ACTAAA      | 0.6%                                           |
| AAAACA      | 0.5%                                           |
| GGGGCT      | 0.3%                                           |

\* From Beaudoin *et al.* (2000)<sup>27</sup>

**Supplementary Table 7.** Amphibian species included in the CATSA database.

| Species or genus                    | TSA size (Mbp) |
|-------------------------------------|----------------|
| <i>Ambystoma mexicanum</i>          | 4.2            |
| <i>Bufo viridis</i>                 | 45             |
| <i>Hynobius chinensis</i>           | 97             |
| <i>Hynobius retardus</i>            | 445            |
| <i>Leptobranchium boringii</i>      | 45             |
| <i>Megophrys</i>                    | 45             |
| <i>Microhyla fissipes</i>           | 85             |
| <i>Odorrana margaretae</i>          | 41             |
| <i>Pelophylax nigromaculatus</i>    | 47             |
| <i>Polypedates megacephalus</i>     | 53             |
| <i>Pseudacris (Hyllola) regilla</i> | 36             |
| <i>Rana (Lithobates) clamitans</i>  | 37             |
| <i>Rana (Lithobates) pipiens</i>    | 886            |
| <i>Rhacophorus dennysi</i>          | 53             |
| <i>Rhacophorus omeimontis</i>       | 39             |
| <i>Tylototriton wenxianensis</i>    | 87             |

**Supplementary Table 8.** Complete mitochondrial genome sequences used in conjunction with our assembled *R. catesbeiana* mitochondrial genome sequence in the phylogenetic analysis.

| Species                              | GenBank Accession |
|--------------------------------------|-------------------|
| <i>Ambystoma mexicanum</i>           | AY659991.1        |
| <i>Bufo japonicas</i>                | NC_009886.1       |
| <i>Bufo tibetanus</i>                | NC_020048.1       |
| <i>Nanorana parkeri</i>              | NC_026789.1       |
| <i>Rana (Lithobates) catesbeiana</i> | AB761267.1        |
| <i>Rana chosenica</i>                | NC_016059.1       |
| <i>Rana draytonii</i>                | NC_028296.1       |
| <i>Rana huanrensis</i>               | NC_028521.1       |
| <i>Rana ishikawae</i>                | NC_015305.1       |
| <i>Rana kunyuensis</i>               | NC_024548.1       |
| <i>Rana nigromaculata</i>            | NC_002805.1       |
| <i>Rana (Lithobates) okaloosae</i>   | NC_028283.1       |
| <i>Ranodon sibiricus</i>             | AJ419960.1        |
| <i>Rana (Lithobates) sylvatica</i>   | NC_027236.1       |
| <i>Tylototriton verrucosus</i>       | NC_017871.1       |

**Supplementary Table 9.** Mitochondrial genes used in phylogenetic analysis.

| <i>Species (Code)</i>                           | GenBank Accession |             |             |
|-------------------------------------------------|-------------------|-------------|-------------|
|                                                 | <i>cyb</i>        | <i>rnr1</i> | <i>rnr2</i> |
| <i>Acris crepitans</i> (ACCR)                   | EF988143          | AY843559    | AY843559    |
| <i>Anaxyrus americanus</i> (ANAM)               | AB159264          | AY680211    | AY680205    |
| <i>Anaxyrus baxteri</i> (ANBA)                  | x                 | AY680207    | AY680207    |
| <i>Anaxyrus boreas</i> (ANBO)                   | EU938403          | EF531994    | HM563856    |
| <i>Anaxyrus cognatus</i> (ANCO)                 | L10968            | EF532241    | DQ158444    |
| <i>Anaxyrus fowleri</i> (ANFO)                  | x                 | DQ158451    | DQ158451    |
| <i>Ambystoma gracile</i> (AMGR)                 | AY691729          | x           | x           |
| <i>Ambystoma macrodactylum</i> (AMMA)           | JX650148          | x           | x           |
| <i>Ascaphus montanus</i> (ASMO)                 | DQ087517          | x           | AY236830    |
| <i>Ascaphus truei</i> (ANTR)                    | AF277330          | AJ871087    | AJ871087    |
| <i>Hyla chrysoscelis</i> (HYCH)                 | AY830956          | x           | x           |
| <i>Hyla versicolor</i> (HYVE)                   | AY830957          | AY843682    | AY843682    |
| <i>Pseudacris crucifer</i> (PSCR)               | KJ536191          | AY843735    | AY843735    |
| <i>Pseudacris maculate</i> (PSMA)               | KJ536217          | x           | KM669659    |
| <i>Pseudacris (Hyllola) regilla</i> (PSRE)      | KJ536196          | AY819376    | AY291112    |
| <i>Pseudacris triseriata</i> (PSTR)             | KJ536224          | AY843738    | AY843738    |
| <i>Plethodon vehiculum</i> (PLVE)               | JF521651          | x           | x           |
| <i>Rana aurora</i> (RAAU)                       | EU552211          | DQ019590    | DQ019607    |
| <i>Rana cascadae</i> (RACA)                     | EU708878          | AY779197    | AY779197    |
| <i>Rana (Lithobates) catesbeiana</i> (LICA)     | NC022696          | M57527      | M57527      |
| <i>Rana (Lithobates) clamitans</i> (LICL)       | AY083277          | KM273857    | AY779204    |
| <i>Rana luteiventris</i> (RALU)                 | AY016649          | AY016717    | AY779194    |
| <i>Rana (Lithobates) palustris</i> (LIPA)       | x                 | JN227372    | AY779228    |
| <i>Rana (Lithobates) pipiens</i> (LIPI)         | EU370724          | EU370710    | DQ347323    |
| <i>Rana pretiosa</i> (RAPR)                     | EU708873          | x           | x           |
| <i>Rana (Lithobates) septentrionales</i> (LISE) | AY083272          | AY779200    | AY779201    |
| <i>Rana (Lithobates) sylvatica</i> (LISY)       | NC027236          | NC027236    | NC027236    |
| <i>Spea bombifrons</i> (SPBO)                   | JX564896          | JX564896    | JX564896    |
| <i>Spea intermontana</i> (SPIN)                 | AY236785          | x           | AY236819    |
| <i>Taricha granulosa</i> (TAGR)                 | EU880333          | EU880333    | x           |
| <i>Xenopus laevis</i> (XELA)                    | NC001573          | NC001573    | NC001573    |



**Supplementary Table 10.** ABySS-Bloom sequence identity calculations between certain mammalian genome assemblies and the *Homo sapiens* genome.

|                        |                              | Estimated time since divergence (MYA) |                                |                               |
|------------------------|------------------------------|---------------------------------------|--------------------------------|-------------------------------|
|                        |                              | <i>Homo sapiens</i>                   | <i>Rattus norvegicus</i>       | <i>Oryctolagus. cuniculus</i> |
| Estimated identity (%) | <i>Homo sapiens</i>          |                                       | 90                             | 90                            |
|                        | <i>Rattus norvegicus</i>     | 81.0 +/- 2.4x10 <sup>-3</sup>         |                                | 82                            |
|                        | <i>Oryctolagus cuniculus</i> | 83.1 +/- 4.4x10 <sup>-4</sup>         | 80.6 ± 1.37 x 10 <sup>-3</sup> |                               |

## ***Supplementary Methods***

### **Targeted gene assembly with Kollektor**

Kollektor is an alignment-free targeted *de novo* assembly pipeline that uses thousands of transcript sequences concurrently to inform the localized assembly of corresponding gene loci<sup>1</sup>. Kollektor scans whole genome shotgun sequencing data to recruit reads that have sequence similarity to input transcripts or previously recruited reads, which are then assembled with ABySS. This greedy approach to read collection enables resolution of intronic regions for the assembly of complete genes.

To provide long-distance information for scaffolding, we used Kollektor to reconstruct the gene loci of the transcripts contained in the BART reference transcriptome. The BART transcripts were randomly divided into 80 bins of approximately 10,000 transcripts each, and Kollektor ran on each bin in parallel (-j 12 -s 0.9 -r 128 -k 128). To evaluate success of the targeted gene assemblies (TGA), the input transcripts were aligned to the Kollektor-assembled sequences with BLASTn<sup>2</sup>, and those transcripts that aligned with 90% sequence identity and 90% query coverage were considered to have had their corresponding gene successfully reconstructed. Transcripts that did not meet these criteria were re-binned and re-tried in the next iteration with parameters tuned for higher sensitivity. This is achieved by lowering the r parameter (number of nucleotide matches required for recruiting a read) and the value of k used in the assembly step. After 5 Kollektor iterations (k and r = 128, 112, 96, 80, 64), 78% of BART transcripts were successfully assembled according to our criteria.

### **Protein coding gene prediction**

Prediction of protein coding genes was performed using the MAKER genome annotation pipeline<sup>3</sup> (version 2.31.8). This framework included RepeatMasker<sup>4</sup> to mask repetitive sequence

elements based on the core RepBase repeat library<sup>5</sup>. Augustus<sup>6</sup>, SNAP<sup>7</sup> and GeneMark<sup>8</sup> were also run within the MAKER2 pipeline to produce *ab initio* gene predictions. BLASTx<sup>2</sup>, BLASTn<sup>2</sup>, and exonerate<sup>9</sup> alignments of human and amphibian Swiss-Prot protein sequences<sup>10</sup> (retrieved 16 February 2016) and BART were combined with the gene predictions to yield the gene models. MAKER2 was first applied to an early version of the bullfrog genome assembly, and the 1000 best gene models by eAED score were used for retraining SNAP<sup>11</sup>.

## **Gene ontology and pathway analysis**

Due to the particularly extensive biological information available for human proteins, a second round of BLASTp alignments were performed between the high confidence set of predicted proteins and the Swiss-Prot human proteins, using the same alignment thresholds noted above. The Uniprot accession IDs and log fold-changes of the differentially expressed genes were collected, input to the Ingenuity Pathway Analysis tool (Qiagen Bioinformatics, Redwood City, CA), and its core analysis was run with default settings. The Database for Annotation, Visualization and Integrated Discovery (DAVID)<sup>12</sup> v6.8 was also used with default settings to perform gene annotation enrichment analysis on the differentially expressed genes versus the background of all bullfrog genes with Uniprot annotations. The enriched annotations were visualized with ReviGO<sup>13</sup> with default settings.

## **Assembly versioning**

The bullfrog genome project produced three main assemblies to date, predominantly differentiated by the incorporation of additional sequencing reads (version 2) and the utilization of progressively more sequence data for scaffolding (version 2 and 3). Version 1 used the 150 bp HiSeq and 300 bp MiSeq PET reads for assembly, and was scaffolded with the MPET and Moleculo (a.k.a. TruSeq) synthetic long reads (Illumina, San Diego, CA). The addition of the 250 bp HiSeq PET reads from 4 new sequencing libraries nearly doubled the sequence coverage of

the genome, and yielded a new base assembly. This assembly was then scaffolded with the MPET and Moleculo reads, as well as the BART reference transcriptome and another ABySS assembly generated at a lower k value, to yield version 2, which is available from NCBI under accession LIAG00000000. The gene annotation, comparative genomics, and differential expression experiment were performed on version 2 of the genome sequence, as indicated in the manuscript. The version 3 assembly was produced by resc scaffolding the version 2 assembly using Chromium linked reads from 10X Genomics (Pleasanton, CA) and the ARCS scaffolding software developed by our group. This assembly has been submitted to NCBI, and early access to it and its annotations are available on the BCGSC ftp site at <ftp://ftp.bcgsc.ca/supplementary/bullfrog>.

## **TH experiment**

We sequenced transcriptomes from the back skin of three individual *R. catesbeiana* tadpoles that were injected with 10 pmol/g body weight of T3 (Sigma-Aldrich Canada Ltd.) prepared in dilute NaOH (ACP Chemicals Inc.) and sacrificed 48 h post-injection. A matched group of vehicle only-injected tadpoles consisted of an additional group of 3 individual animals. Details of the exposures and evidence of tissue responsiveness to T3 treatment using qPCR of these animals can be found in Maher *et al.* (2016). These samples were also used by Maher *et al.* (2016), but within the context of a separate study with distinct analyses focused solely on targeted qPCR of select mRNA transcripts. The samples were randomized during processing and the technician was blind to the hormone treatment status.

Single-stranded RNA-Seq libraries were generated from these six samples individually using Illumina HiSeq 2500 paired-end sequencing platform (San Diego, CA, USA) and 100 base pair (bp) paired end sequencing protocol following manufacturer's instructions. Information on the six

read libraries is shown in Supplementary Table 5. The high read depth per library at this sample size is expected to yield adequate statistical power for the differential expression analysis<sup>14</sup>.

## **qPCR analysis of transcript abundance**

Transcript abundance of select transcripts encoding proteins involved in RNA/DNA processing and lncRNAs was determined using methods and conditions published previously<sup>15</sup>. The primer sequences, annealing temperatures, and amplicon sizes are shown in Supplementary Table 4.

## **lncRNA detection**

The workflow used to detect candidate lncRNAs is summarized in Supplementary Figure 9. First, open reading frames (ORFs) were predicted using TransDecoder v3.0.0 ([transdecoder.github.io](https://transdecoder.github.io)) with the default parameters, and contigs with complete or partial predicted ORFs were excluded. We also performed 3-frame *in silico* translations of the contigs to evaluate the validity of any potential encoded peptides via comparison to the Pfam curated database of peptide motifs<sup>16</sup> using HMMScan v3.1b2 from the HMMER package<sup>17</sup>. Furthermore, we did a six-frame translation of our nucleotide sequences, and queried them against Uniref90<sup>18</sup> and NCBI's RefSeq databases using the BLASTx program from NCBI's BLAST+ (v2.4.0) software package<sup>2</sup>. We discarded all contigs that returned a hit to any sequence in these databases at e-value < 10<sup>-5</sup>. We constructed a comprehensive amphibian transcriptome shotgun assembly database (CATSA) by downloading and combining nucleotide sequences for 16 amphibian species (Supplementary Table 4) from the NCBI Genbank Transcriptome Shotgun Assembly Sequence (TSA) database<sup>19</sup>. We interrogated our putative lncRNA contig set against this CATSA database for homologs that could add confidence to our set. We also did a similarity search against lncRNA sequences present in lncRNADB<sup>20</sup> and LNCipedia<sup>21</sup>, which are databases of previously reported lncRNAs.

We assessed the coding potential of our contigs with Coding Potential Calculator (CPC)<sup>22</sup> v0.9-r2, and filtered out any contig that returned a CPC score greater than 1.

### **Repetitive sequence element detection**

The content of repetitive sequence elements in the version 2 draft genome assembly was evaluated with RepeatMasker<sup>4</sup> (version 4.0.6) with default settings. The RepBase collection of repeat sequence elements was supplemented with novel elements identified using RepeatModeler<sup>23</sup> (version 1.0.8) with RMBlast (version 2.2.27+, <http://www.repeatmasker.org/RMBlast.html>) applied to the draft genome assembly with default settings.

## Supplementary References

- 1 Kucuk, E. *et al.* Kollektor: transcript-informed, targeted *de novo* assembly of gene loci. *Bioinformatics* **33**, 1782-1788 (2017).
- 2 Camacho, C. *et al.* BLAST+: architecture and applications. *BMC Bioinformatics* **10**, 421 (2009).
- 3 Holt, C. & Yandell, M. MAKER2: an annotation pipeline and genome-database management tool for second-generation genome projects. *BMC Bioinformatics* **12**, 491 (2011).
- 4 Smit, A. F. A., Hubley, R. & Green, P. *RepeatMasker Open-4.0*, [<http://www.repeatmasker.org/>](http://www.repeatmasker.org/) (2015).
- 5 Jurka, J. *et al.* Repbase Update, a database of eukaryotic repetitive elements. *Cytogenet. Genome Res.* **110**, 462-467 (2005).
- 6 Stanke, M., Schoffmann, O., Morgenstern, B. & Waack, S. Gene prediction in eukaryotes with a generalized hidden Markov model that uses hints from external sources. *BMC bioinformatics* **7**, 62 (2006).
- 7 Korf, I. Gene finding in novel genomes. *BMC Bioinformatics* **5**, 59 (2004).
- 8 Ter-Hovhannisyan, V., Lomsadze, A., Chernoff, Y. O. & Borodovsky, M. Gene prediction in novel fungal genomes using an *ab initio* algorithm with unsupervised training. *Genome Res.* **18**, 1979-1990 (2008).
- 9 Slater, G. S. & Birney, E. Automated generation of heuristics for biological sequence comparison. *BMC Bioinformatics* **6**, 31 (2005).
- 10 UniProt, C. UniProt: a hub for protein information. *Nucleic Acids Res.* **43**, D204-212 (2015).
- 11 Cantarel, B. L. *et al.* MAKER: an easy-to-use annotation pipeline designed for emerging model organism genomes. *Genome Res.* **18**, 188-196 (2008).

- 12 Huang, D. W., Sherman, B. T. & Lempicki, R. A. Systematic and integrative analysis of large gene lists using DAVID bioinformatics resources. *Nat. Protoc.* **4**, 44-57 (2009).
- 13 Supek, F., Bošnjak, M., Škunca, N. & Šmuc, T. REVIGO summarizes and visualizes long lists of gene ontology terms. *PLoS ONE* **6**, e21800 (2011).
- 14 Ching, T., Huang, S. & Garmire, L. X. Power analysis and sample size estimation for RNA-Seq differential expression. *RNA* **20**, 1684-1696 (2014).
- 15 Maher, S. K. *et al.* Rethinking the biological relationships of the thyroid hormones, l-thyroxine and 3,5,3'-triiodothyronine. *Comp. Biochem. Physiol. Part D Genomics Proteomics* **18**, 44-53 (2016).
- 16 Finn, R. D. *et al.* Pfam: the protein families database. *Nucleic Acids Res.* **42**, D222-230 (2014).
- 17 Finn, R. D. *et al.* HMMER web server: 2015 update. *Nucleic Acids Res.* **43**, W30-38 (2015).
- 18 Suzek, B. E. *et al.* UniRef clusters: a comprehensive and scalable alternative for improving sequence similarity searches. *Bioinformatics* **31**, 926-932 (2015).
- 19 Clark, K., Karsch-Mizrachi, I., Lipman, D. J., Ostell, J. & Sayers, E. W. GenBank. *Nucleic Acids Res.* **44**, D67-72 (2016).
- 20 Quek, X. C. *et al.* lncRNADB v2.0: expanding the reference database for functional long noncoding RNAs. *Nucleic Acids Res.* **43**, D168-173 (2015).
- 21 Volders, P. J. *et al.* An update on LNCipedia: a database for annotated human lncRNA sequences. *Nucleic Acids Res.* **43**, D174-180 (2015).
- 22 Kong, L. *et al.* CPC: assess the protein-coding potential of transcripts using sequence features and support vector machine. *Nucleic Acids Res.* **35**, W345-349 (2007).
- 23 Smit, A. F. A. & Hubley, R. *RepeatModeler Open-1.0*, <<http://www.repeatmasker.org>> (2015).



- 24 Tamura, K. & Nei, M. Estimation of the number of nucleotide substitutions in the control region of mitochondrial DNA in humans and chimpanzees. *Mol. Biol. Evol.* **10**, 512-526 (1993).
- 25 Kumar, S., Stecher, G. & Tamura, K. MEGA7: molecular evolutionary genetics analysis version 7.0 for bigger datasets. *Mol. Biol. Evol.* **33**, 1870-1874 (2016).
- 26 Sun, Y. B. *et al.* Whole-genome sequence of the Tibetan frog *Nanorana parkeri* and the comparative evolution of tetrapod genomes. *Proc. Natl. Acad. Sci. USA* **112**, E1257-1262 (2015).
- 27 Beaudoin, E., Freier, S., Wyatt, J. R., Claverie, J. M. & Gautheret, D. Patterns of variant polyadenylation signal usage in human genes. *Genome Res.* **10**, 1001-1010 (2000).
